# Supplementary material for: First-Void Urine Microbiome in Women with Chlamydia trachomatis Infection
Source: MDPI journal article supplement (doi:10.3390/ijms23105625), 2022-05-17
Supplement: s1 [file s1]

## Supplementary materials

**Figure S1. Co-abundance analysis and clustering.** Heatmap reporting the co-presence (red) and co-absence (blue) Pearson correlation between the 15 most abundant bacterial genera. Bacteria have been clustered for co-presence similarity into 5 Co-Abundant Groups (CAG) through Ward linkage, and CAGs have been named after the most abundant genus: “*Gardnerella*-CAG” (yellow), “*Ureaplasma*-CAG” (blue), “*Streptococcus*-CAG” (green), “*Lactobacillus*-CAG” (fuchsia), “*Klebsiella*-CAG” (purple).

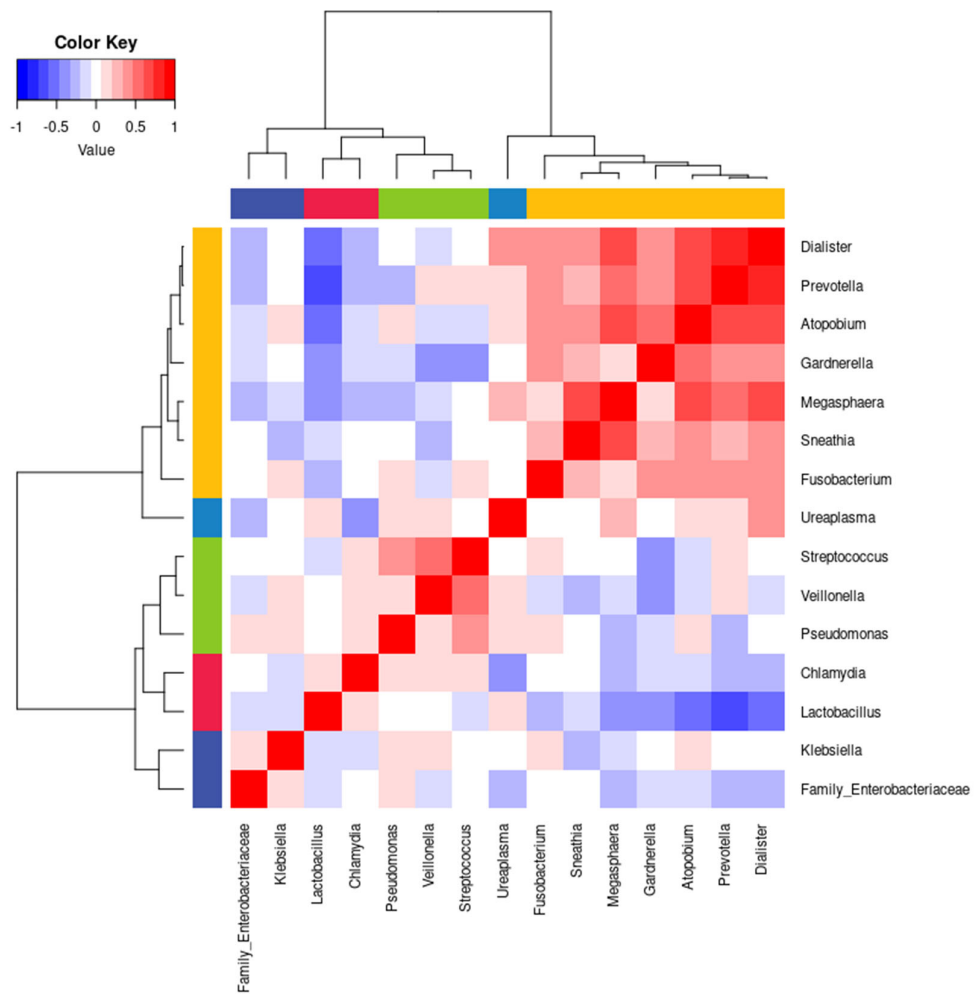

**Table S1. Taxonomic relative abundances at phylum, family, genus levels.** Average relative abundances and standard deviation values are reported for each infection status (not-infected patient, CT-; CT-infected patient, CT+) at the different phylogenetic levels, along with statistical p-values (non-parametric Mann–Whitney U test); p<0.05 were considered significant.

| Taxonomy         |                           |                                 | Average (SD)     |                  | p     | significance |
|------------------|---------------------------|---------------------------------|------------------|------------------|-------|--------------|
| Phylum           | Family                    | Genus                           | CT-              | CT+              |       |              |
| Firmicutes       |                           |                                 | 77.17<br>(19.93) | 66.43<br>(26.36) | 0.205 |              |
|                  | <i>Lactobacillaceae</i>   |                                 | 66.52<br>(28.28) | 62.3 (28.92)     | 0.693 |              |
|                  |                           | <i>Lactobacillus</i>            | 66.52<br>(28.28) | 62.3 (28.92)     | 0.693 |              |
|                  | <i>Veillonellaceae</i>    |                                 | 5.08 (13.3)      | 1.36 (2.57)      | 0.369 |              |
|                  |                           | <i>Veillonella</i>              | 3.09 (13.15)     | 0.03 (0.03)      | 0.449 |              |
|                  |                           | <i>Dialister</i>                | 1.53 (3.37)      | 0.51 (0.73)      | 0.329 |              |
|                  |                           | <i>Megasphaera</i>              | 0.42 (1.63)      | 0.82 (1.89)      | 0.536 |              |
|                  |                           |                                 |                  | 10.92<br>(17.64) | 0.547 |              |
| Actinobacteriota |                           |                                 | 7.96 (9.99)      |                  |       |              |
|                  | <i>Bifidobacteriaceae</i> |                                 | 6.83 (9.57)      | 9.98 (17.12)     | 0.507 |              |
|                  |                           | <i>Gardnerella</i>              | 6.38 (9.79)      | 9.94 (17.12)     | 0.457 |              |
|                  |                           | <i>Bifidobacterium</i>          | 0.37 (1.17)      | 0.01 (0.02)      | 0.310 |              |
|                  | <i>Atopobiaceae</i>       |                                 | 0.47 (1.02)      | 0.68 (1.59)      | 0.659 |              |
|                  |                           | <i>Atopobium</i>                | 0.47 (1.02)      | 0.68 (1.59)      | 0.658 |              |
|                  |                           | <i>Corynebacterium</i>          | 0.30 (0.59)      | 0.11 (0.23)      | 0.313 |              |
| Proteobacteria   |                           |                                 |                  | 12.41<br>(18.85) | 0.312 |              |
|                  | <i>Pseudomonadaceae</i>   |                                 | 4.05 (6.14)      | 5.98 (7.87)      | 0.451 |              |
|                  |                           | <i>Pseudomonas</i>              | 4.05 (6.14)      | 5.98 (7.87)      | 0.451 |              |
|                  | <i>Enterobacteriaceae</i> |                                 | 2.2 (9.15)       | 6.02 (19.25)     | 0.449 |              |
|                  |                           | <i>Uncl. Enterobacteriaceae</i> | 2.00 (9.18)      | 0.14 (0.42)      | 0.508 |              |
|                  |                           | <i>Klebsiella</i>               | 0.02 (0.08)      | 5.81 (19.28)     | 0.172 |              |
| Bacteroidetes    |                           |                                 | 6.29 (10.21)     | 6.07 (12.40)     | 0.957 |              |
|                  | <i>Prevotellaceae</i>     |                                 | 5.74 (9.39)      | 5.59 (11.34)     | 0.967 |              |
|                  |                           | <i>Prevotella</i>               | 5.58 (9.15)      | 5.58 (11.33)     | 1     |              |
|                  | <i>Streptococcaceae</i>   |                                 | 0.61 (1.34)      | 0.35 (0.51)      | 0.534 |              |
|                  |                           | <i>Streptococcus</i>            | 0.61 (1.34)      | 0.35 (0.51)      | 0.534 |              |
|                  | <i>Porphyromonadaceae</i> |                                 | 0.34 (1.18)      | 0.42 (1.04)      | 0.858 |              |
|                  |                           | <i>Porphyromonas</i>            | 0.34 (1.18)      | 0.42 (1.04)      | 0.852 |              |
|                  |                           | <i>Chlamydia</i>                | 0.01 (0.03)      | 2.13 (5.10)      | 0.063 |              |
| Fusobacteriota   |                           |                                 | 1.22 (4.88)      | 1.92 (4.00)      | 0.682 |              |
|                  | <i>Leptotrichiaceae</i>   |                                 | 0.72 (3.04)      | 1.64 (4.07)      | 0.472 |              |
|                  | <i>Fusobacteriaceae</i>   |                                 | 0.50 (1.84)      | 0.28 (0.54)      | 0.707 |              |
|                  |                           | <i>Sneathia</i>                 | 0.72 (3.04)      | 1.64 (4.07)      | 0.472 |              |
|                  |                           | <i>Fusobacterium</i>            | 0.5 (1.84)       | 0.28 (0.54)      | 0.707 |              |

|             |                         |             |             |       |   |
|-------------|-------------------------|-------------|-------------|-------|---|
| Other phyla |                         |             |             |       |   |
|             | <i>Mycoplasmataceae</i> | 3.24 (3.60) | 0.37 (0.53) | 0.014 | * |
|             | <i>Ureaplasma</i>       | 3.11 (3.44) | 0.34 (0.53) | 0.013 | * |

---
